# Supplementary material for: Assembly defects of human tRNA splicing endonuclease contribute to impaired pre-tRNA processing in pontocerebellar hypoplasia
Source: PubMed Central journal article supplement (PMC8479045; doi:10.1038/s41467-021-25870-3), 2021-09-28
Supplement: 41467_2021_25870_MOESM1_ESM.pdf [file 41467_2021_25870_MOESM1_ESM.pdf]

## Supplementary Information

### Assembly defects of human tRNA splicing endonuclease contribute to impaired pre-tRNA processing in pontocerebellar hypoplasia

Samoil Sekulovski<sup>1†</sup>, Pascal Devant<sup>1,2,3†</sup>, Silvia Panizza<sup>4†</sup>, Tasos Gogakos<sup>5</sup>, Anda Pitiriciu<sup>1</sup>, Katharina Heitmeier<sup>1</sup>, Ewan Phillip Ramsay<sup>6</sup>, Marie Barth<sup>7</sup>, Carla Schmidt<sup>7</sup>, Thomas Tuschl<sup>5</sup>, Frank Baas<sup>8</sup>, Stefan Weitzer<sup>4</sup>, Javier Martinez<sup>4\*</sup> & Simon Trowitzsch<sup>1\*</sup>

<sup>1</sup> Institute of Biochemistry, Biocenter, Goethe University Frankfurt, Max-von-Laue Strasse 9, 60438 Frankfurt/Main, Germany.

<sup>2</sup> Ph.D. Program in Virology, Harvard Medical School, Boston, MA 02115, USA.

<sup>3</sup> Harvard Medical School and Division of Gastroenterology, Boston Children's Hospital, Boston, 300 Longwood Avenue, MA 02115, USA.

<sup>4</sup> Max Perutz Labs, Medical University of Vienna, Vienna Biocenter (VBC), Dr. Bohr-Gasse 9/2, 1030 Vienna, Austria.

<sup>5</sup> Laboratory for RNA Molecular Biology, The Rockefeller University, 1230 York Avenue, New York, NY 10065, USA.

<sup>6</sup> The Institute of Cancer Research, 237 Fulham Road, London, SW3 6JB, United Kingdom

<sup>7</sup> Interdisciplinary research center HALOmem, Charles Tanford Protein Center, Institute of Biochemistry and Biotechnology, Martin Luther University Halle-Wittenberg, Kurt-Mothes-Strasse 3a, 06120 Halle, Germany.

<sup>8</sup> Department of Clinical Genetics, Leiden University, Albinusdreef 2, 2333 ZA Leiden, Netherlands.

† These authors contributed equally: Samoil Sekulovski, Pascal Devant, Silvia Panizza.

\* Corresponding authors: J.M. (e-mail: javier.martinez@meduniwien.ac.at),

S.T. (e-mail: trowitzsch@biochem.uni-frankfurt.de)

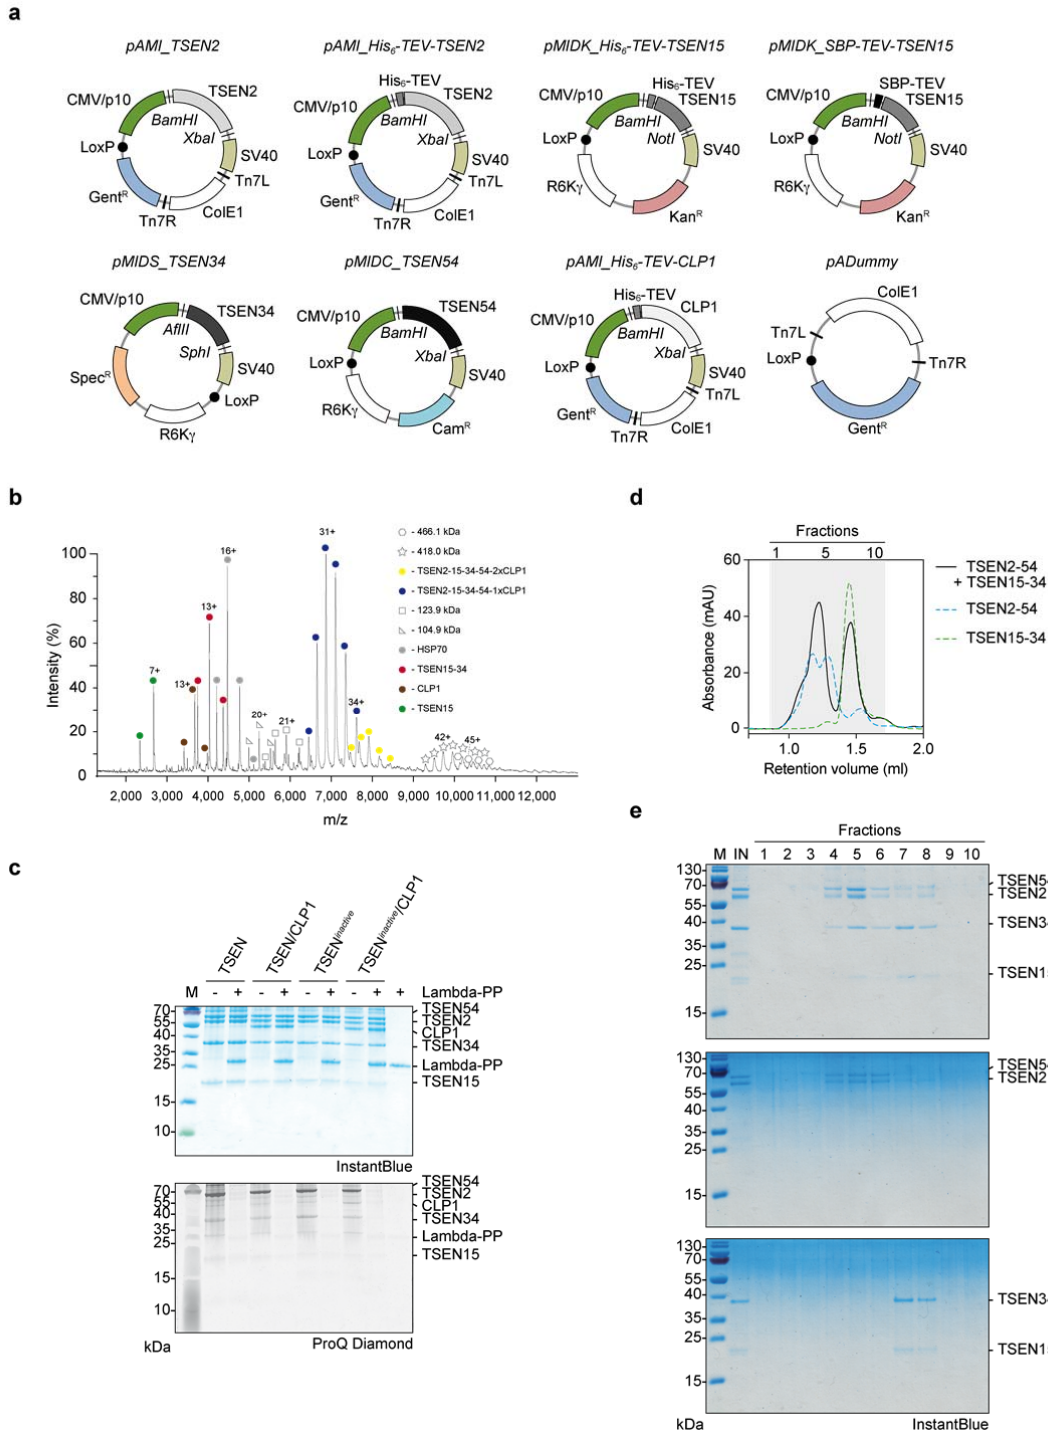

30  
31

32 Supplementary Figure 1. **Biochemical characterization of recombinant TSEN and TSEN/CLP1**  
 33 **complexes.** **a** Maps of modified MultiBac vectors encoding TSEN/CLP1 complex components. For  
 34 expression in mammalian and insect cells, the acceptor vector pAMI and donor vectors pMIDC,  
 35 pMIDK, and pMIDS carry the CMV/p10 dual promoter. Transcription is terminated by the SV40 poly-A  
 36 late signal (SV40). The transposase elements Tn7L and Tn7R, the LoxP element (black dot) for Cre-

37 mediated recombination, the origins of replication ColE1 and R6K $\gamma$ , and the resistance markers for  
38 gentamicin (Gent<sup>R</sup>), chloramphenicol (Cam<sup>R</sup>), kanamycin, (Kan<sup>R</sup>), and spectinomycin (Spec<sup>R</sup>) are  
39 shown. Restriction sites, hexahistidine-tags (His<sub>6</sub>), the Streptavidin-binding peptide-tag (SBP), and the  
40 TEV cleavage site (TEV) are indicated. **b** Native mass spectrum of pentameric TSEN/CLP1 complex  
41 from an aqueous ammonium acetate solution. Charge states of the predominant TSEN/CLP1  
42 assembly (blue circles), a minor populated TSEN complex with two CLP1 subunits (yellow circles),  
43 monomeric CLP1 (brown circles), HSP70 (grey circles), the TSEN15–34 heterodimer (red circles) and  
44 TSEN15 (green circles) are indicated. Unidentified protein assemblies are denominated by their  
45 molecular weights. **c** Analysis of phosphorylation states of TSEN components by the phospho-specific  
46 ProQ Diamond gel stain. The strong band at 59 kDa in the ProQ Diamond stain corresponds to  
47 TSEN54. Lambda-PP, Lambda protein phosphatase. Gels are representative of three independent  
48 experiments. **d** Assembly assay with TSEN2–54 and TSEN15–34 heterodimers via size exclusion  
49 chromatography (SEC). Absorbance profiles (280 nm) of reconstituted TSEN complex (black line), and  
50 the heterodimers TSEN2–54 (blue dashed line) and TSEN15–34 (green dashed line) are shown. **e**  
51 SDS-PAGE of SEC fractions (grey area as indicated in **d**) with subsequent InstantBlue staining. Gels  
52 are representative of two independent experiments. Source data for **c** and **e** are provided as Source  
53 Data file.

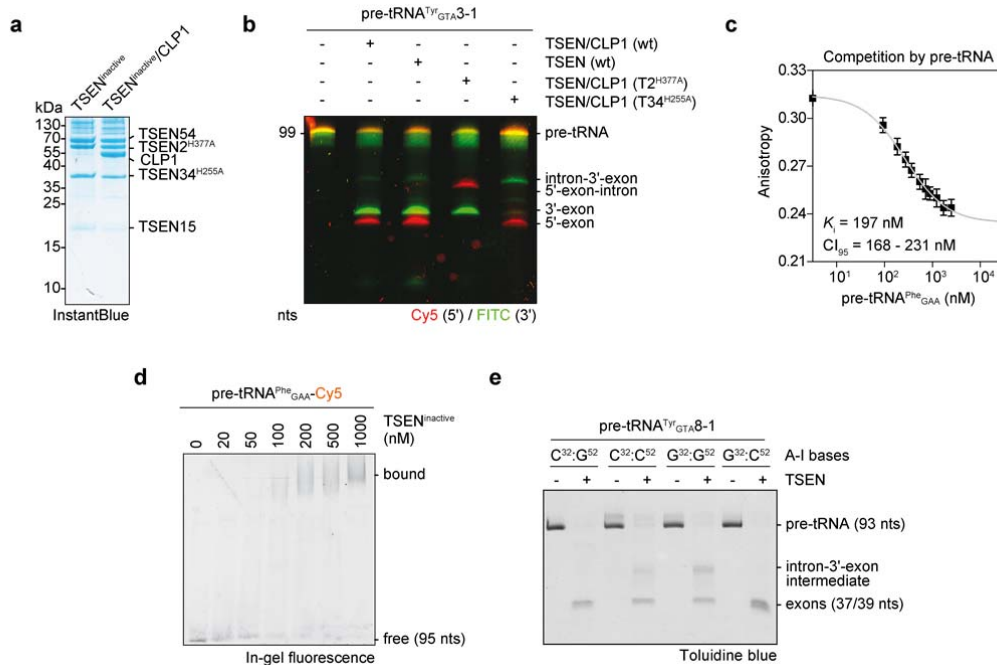

54  
55

56 **Supplementary Figure 2. Active involvement of the A-I base pair in coordinating pre-tRNA**  
 57 **cleavage.** **a** SDS-PAGE of purified, recombinant inactive TSEN and inactive TSEN/CLP1 complexes  
 58 (TSEN2<sup>H377A</sup> and TSEN34<sup>H255A</sup> double mutant). Protein size markers and protein identities are  
 59 indicated. **b** Two-colored pre-tRNA cleavage assay with TSEN-STREP and TSEN/CLP1-FLAG wt  
 60 complexes and complexes carrying the TSEN2<sup>H377A</sup> (T2<sup>H377A</sup>) or TSEN34<sup>H255A</sup> (T34<sup>H255A</sup>) substitution.  
 61 RNA cleavage products were separated on a denaturing urea-PAGE and visualized by fluorescence of  
 62 cyanine5 (Cy5) and Fluorescein (FITC). **c** Thermodynamic competition parameters deduced from  
 63 fluorescence anisotropy experiments. Inactive, tetrameric TSEN bound to fluorescently labeled pre-  
 64 tRNA<sup>Phe<sub>GAA</sub></sup> was titrated with unlabeled pre-tRNA. Data are represented as mean values  $\pm$ SD. **d**  
 65 Electrophoretic mobility shift assay with fluorescently labeled pre-tRNA<sup>Phe<sub>GAA</sub></sup> and inactive, tetrameric  
 66 TSEN (TSEN<sup>inactive</sup>). Free and bound fractions of pre-tRNA were analyzed via 4% TBE native PAGE  
 67 with subsequent in-gel fluorescence measurement. **e** Impact of A-I base pair mutations in pre-  
 68 tRNA<sup>Tyr<sub>GTA</sub>8-1</sup> on endonucleolytic activity by tetrameric TSEN revealed by a pre-tRNA cleavage assay.  
 69  $CI_{95}$  – 95% confidence interval, C<sup>32</sup>:G<sup>52</sup> – canonical A-I base pair, C<sup>32</sup>:C<sup>52</sup> and G<sup>32</sup>:G<sup>52</sup> – disrupted A-I  
 70 base pair, G<sup>32</sup>:C<sup>52</sup> – inverted A-I base pair. Panels are representatives of three independent  
 71 experiments. Source data for **a**, **b**, **d**, and **e** are provided as Source Data file.

72

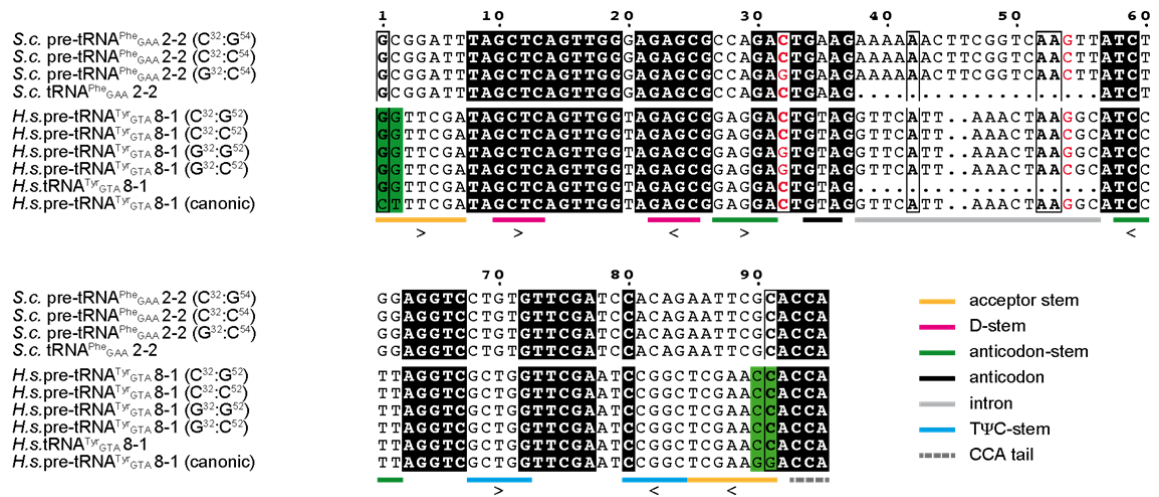

73

74 Supplementary Figure 3. **Sequence comparison of pre-tRNA and tRNA molecules.** Sequence  
 75 alignments were performed using Clustal Omega, edited in Jalview and colored by conservation using  
 76 ESPrnt 3.0. A-I base pair residues are colored in red. Predicted stem structures, anticodon, intron  
 77 and CCA tail are indicated by colored bars. Ribonucleotides modified for efficient *in vitro* transcription  
 78 are boxed in green and compared to the canonical sequence.

79

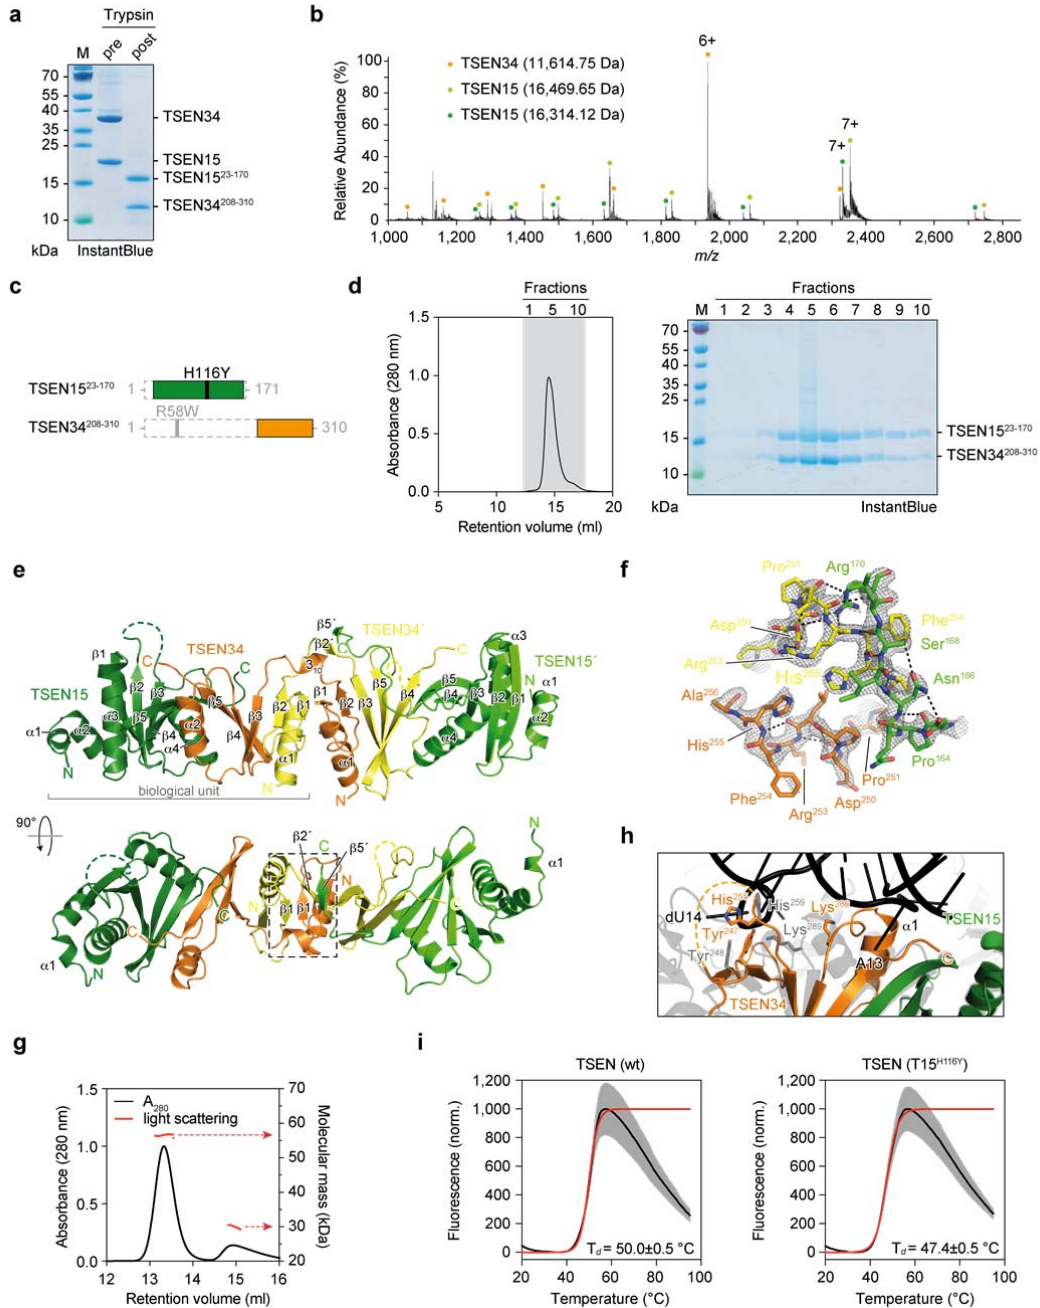

80  
81

82 Supplementary Figure 4. **X-ray crystal structure of a TSEN15–34 heterodimer derived by limited**  
83 **proteolysis.** **a** Analysis of the limited tryptic digestion of the TSEN15–34 heterodimer by SDS-PAGE.  
84 **b** Denaturing mass spectrometry of the proteolytically stable fragments of the TSEN15–34 heterodimer  
85 from an aqueous ammonium acetate solution. The mass spectrometry shows the presence of a TSEN34  
86 fragment (orange circles), and two TSEN15 fragments (dark and light green circles) differing in mass  
87 only by a C-terminal arginine as revealed by LC-MS/MS. **c** Bar diagrams of tryptic fragments of  
88 TSEN15 and TSEN34. Proteolyzed regions are indicated by dashed boxes. Positions of PCH

89 mutations are shown. **d** Purification of the re-cloned core of the TSEN15–34 heterodimer via SEC.  
90 The absorbance profile at 280 nm is shown. Fractions of the indicated retention range (grey area)  
91 were analyzed by SDS-PAGE. **e** Asymmetric unit of the TSEN15–34 crystal. The biological unit  
92 (bracket) and the domain-swap area (dashed box) are indicated.  $\alpha$ -helices and  $\beta$ -sheets are  
93 numbered for each subunit. **f** Stick representation of amino acids of the domain-swap area with  
94 electron density ( $2F_o - F_c$ ,  $1.5\sigma$ ). **g** Molecular mass determination by size exclusion chromatography  
95 multi-angle light scattering (SEC-MALS) of the TSEN15–34 sample used for crystallization. The data  
96 reveal a dominant population of a dimer-of-a-heterodimer (13.2 ml, 56.6 kDa) and a minor populated  
97 heterodimer (14.9 ml, 30.0 kDa). Light scattering is shown as red dots. Mass determination by SEC-  
98 MALS was confirmed by two independent experiments. **h** Superposition of the TSEN15–34  
99 heterodimer and the pre-tRNA endonuclease from *Archaeoglobus fulgidus* at the interaction sites with  
100 the bulge-helix-bulge RNA (PDB ID 2GJW). Nucleotide positions of the RNA (black) and residues of  
101 the catalytic triads are shown. **i** Representative thermal denaturation curves ( $n=2$ ) as shown in [Fig. 3g](#)  
102 of recombinant wt TSEN and mutant TSEN (T15<sup>H116Y</sup>) complexes derived from DSF. Sigmoidal  
103 Boltzmann fits are shown as red lines (black lines represent mean values). Grey zones show SDs  
104 from technical triplicates. Denaturation temperature ( $T_d$ ) is presented with error of fit. Gels shown in **a**  
105 and **d** are representative of three independent experiments. Source data for **a** and **d** are provided as  
106 Source Data file.  
107



**a**

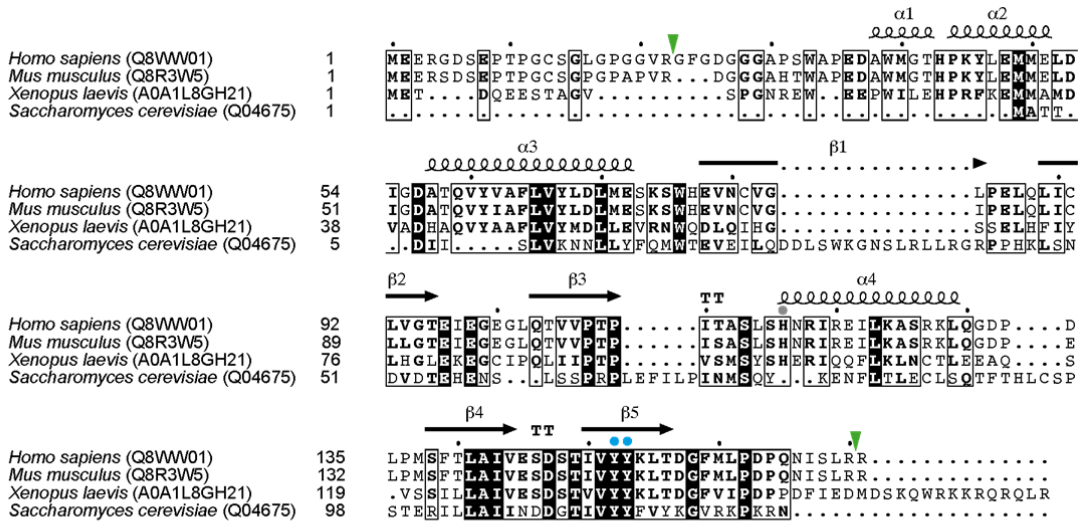

**b**

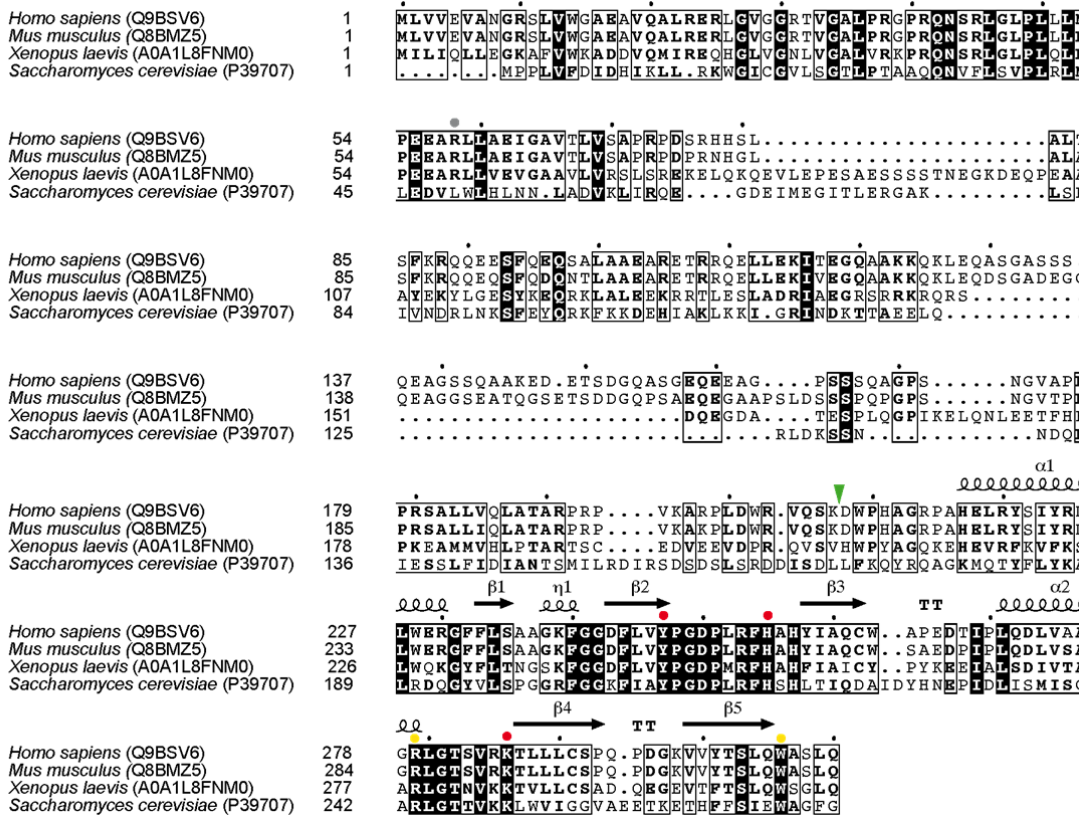

108

109 Supplementary Figure 5. **Sequence conservation of TSEN15 and TSEN34.** Sequence alignments  
 110 were performed using Clustal Omega and colored by conservation using ESPrnt 3.0. **a** The TSEN15  
 111 sequence alignment includes orthologues from *Homo sapiens* (UniProtKB Q8WVW01), *Mus musculus*  
 112 (UniProtKB Q8R3W5), *Xenopus laevis* (UniProtKB A0A1L8GH21), and *Saccharomyces cerevisiae*  
 113 (UniProtKB Q04675). **b** The TSEN34 sequence alignment includes orthologues from *Homo sapiens*



114 (UniProtKB Q9BSV6), *Mus musculus* (UniProtKB Q8BMZ5), *Xenopus laevis* (UniProtKB  
115 A0A1L8FNM0), and *Saccharomyces cerevisiae* (UniProtKB P39707). Tryptic sites identified from  
116 limited proteolysis experiments are shown by green arrow heads. The YY-motif is indicated by blue  
117 circles, residues of the catalytic triad are highlighted by red circles, and residues possibly involved in  
118 the cation- $\pi$ -interaction are shown as yellow circles. Residues mutated in PCH (TSEN15<sup>H116Y</sup>,  
119 TSEN34<sup>R58W</sup>) are indicated by grey circles. Helices and strands are numbered sequentially according  
120 to the TSEN15–34 X-ray crystal structure and are indicated above the alignments. TT –  $\beta$ -turn.  
121

|                                               |     |                                                        |
|-----------------------------------------------|-----|--------------------------------------------------------|
| <i>Methanocaldococcus jannaschii</i> (Q58819) | 1   | MVRDKMGKKITGLLDGDRVIVFDKNGISKLSARHYGNVEGNFLSLSLVEALVYL |
| <i>Aeropyrum pernix</i> (Q9YE85)              | 1   | .....MGK.GEGEVAGCKAAARLG..VEGVF..VEECFDGSYCRNLER.IGYL  |
| <i>Nanoarchaeum equitans</i> (Q74MS9)         | 1   | .....MNLRIIP..WKEVY..YLGYNMGNYIKISEPELLFV              |
| <i>Pyrobaculum aerophilum</i> (Q8ZYG69)       | 1   | .....                                                  |
| <i>Methanopyrus kandleri</i> (Q8TGZ59)        | 1   | .....MAAKGELVGSKVLVVRNDRDANRLYSSMYGKPSRRGLQLWPPEALFL   |
|                                               |     |                                                        |
| <i>Methanocaldococcus jannaschii</i> (Q58819) | 54  | INLGWLEVVKYKDNKPLSFEELVEYARNVEERL.....CLKYLVE          |
| <i>Aeropyrum pernix</i> (Q9YE85)              | 43  | R.KGRLEPL.EAAYQA.SRGMCMG...ETRGWAAAVEVIAGLGLSLDTALVY   |
| <i>Nanoarchaeum equitans</i> (Q74MS9)         | 32  | L.R..NKPQIKDRCLKLDEKTIKKEGVKKYKNFWEI.....YYTV          |
| <i>Pyrobaculum aerophilum</i> (Q8ZYG69)       | 1   | .....MDVLEQ.....QVF                                    |
| <i>Methanopyrus kandleri</i> (Q8TGZ59)        | 47  | CEIGRLEVRSGN.VRISPEELMDRFVEEDPRF.....PVRVAVY           |
|                                               |     |                                                        |
| <i>Methanocaldococcus jannaschii</i> (Q58819) | 93  | KDLRTRGYIVKTGLKYGADFRLYERGANIDKEHSVYLVKVF.PEDSSFLSEEL  |
| <i>Aeropyrum pernix</i> (Q9YE85)              | 90  | FDLRRKGRKP.....L..VGVRRGTLVYEHGGRVYEVLVL.SEGYPLKIGSL   |
| <i>Nanoarchaeum equitans</i> (Q74MS9)         | 68  | KDLILLRGYRVRFDGFF...IELYEKGIIPGTIEQDYLYVVP.SGEIRMTWDEL |
| <i>Pyrobaculum aerophilum</i> (Q8ZYG69)       | 10  | KDLKSRGFKI.....IEQLDDKIFIAEKKERLYFPYVM.VEGVEVTIQTL     |
| <i>Methanopyrus kandleri</i> (Q8TGZ59)        | 85  | ADLRRRGWKPKPGRKFGTEFRARFRGEDER.....IAVKVLELDEFTAQDL    |
|                                               |     |                                                        |
| <i>Methanocaldococcus jannaschii</i> (Q58819) | 145 | TGFVVRVAHSVRKKLLIATVDA DGDIVYYNMTYVKP.....             |
| <i>Aeropyrum pernix</i> (Q9YE85)              | 134 | VEWSRGASMDNHSPIVAVDRTGLITYEARAVRSIQ.....               |
| <i>Nanoarchaeum equitans</i> (Q74MS9)         | 117 | LDIYNKAIARKSKFMLAVDS EGDVTYYEPRKLRSNK.....             |
| <i>Pyrobaculum aerophilum</i> (Q8ZYG69)       | 53  | LSVINMGETLSMPVVALVSN DGTVTYYVVRKIRLPRNIYAEAV           |
| <i>Methanopyrus kandleri</i> (Q8TGZ59)        | 132 | LEWLKLV EGT E FELVVALV DNDYDLNYYVFSSELVVL.....         |

123 Supplementary Figure 6. **Sequence conservation of Archaeal  $\alpha_4$  and  $(\alpha\beta)_2$  endonucleases**

124 **highlighting the YY-motif.** Sequence alignments were performed using Clustal Omega and colored

125 by conservation using ESPrpt 3.0. The sequence alignment includes orthologues from

126 *Methanocaldococcus jannaschii* (UniProtKB Q58819), *Aeropyrum pernix* (UniProtKB Q9YE85),

127 *Nanoarchaeum equitans* (UniProtKB Q74MS9), *Pyrobaculum aerophilum* (UniProtKB Q8ZYG6), and

128 *Methanopyrus kandleri* (UniProtKB Q8TGZ5). The YY-motif is indicated by blue dots.

129

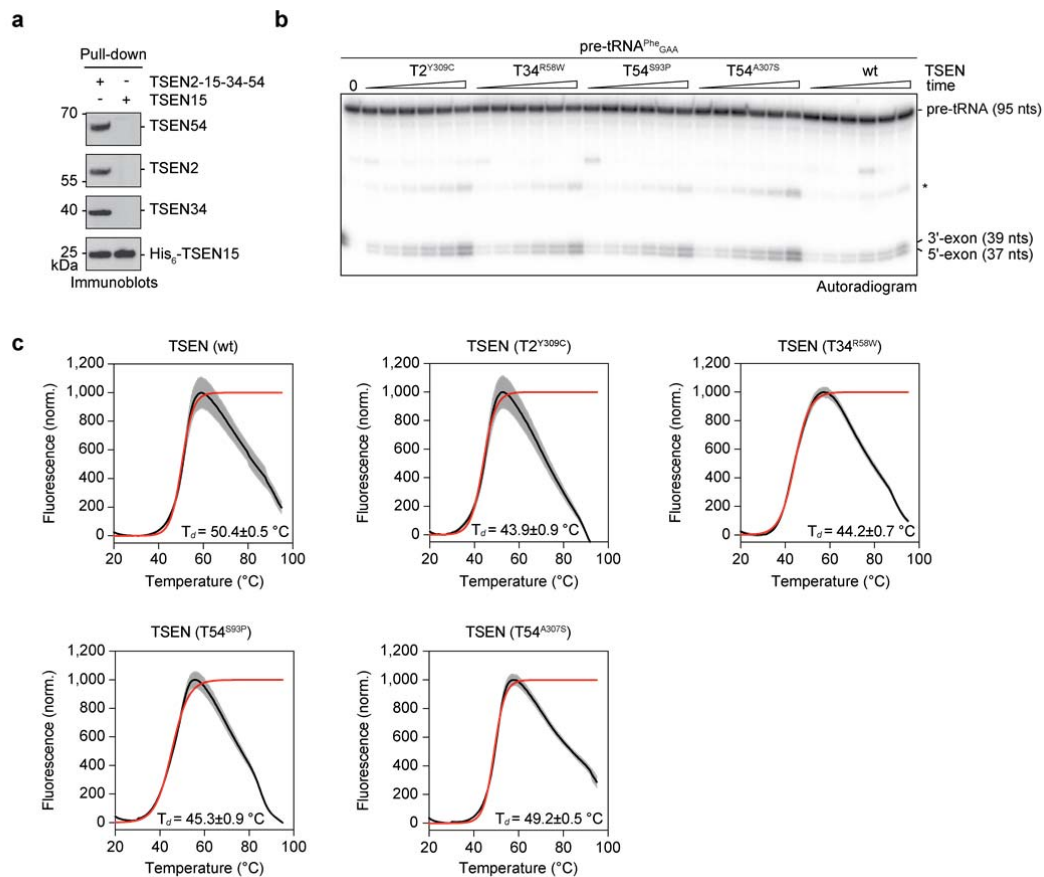

131

132 Supplementary Figure 7. **PCH mutations affect thermal stability but not activity of recombinant**133 **TSEN in vitro.** **a** Pull-down assay from HEK293T cells overexpressing TSEN subunits TSEN2, His<sub>6</sub>-134 TSEN15, TSEN34, and TSEN54, or His<sub>6</sub>-TSEN15 alone. Co-precipitated proteins were visualized by135 immunoblotting. **b** Pre-tRNA cleavage assay (time course) of radioactively labelled S.c. pre-136 tRNA<sup>Phe</sup><sub>GAA</sub> with wt or mutant TSEN complexes revealed by phosphorimaging. The asterisk indicates137 an intermediate cleavage product. **c** Representative thermal denaturation curves as shown in Fig. 4d

138 of recombinant wt and mutant TSEN complexes derived from DSF with sigmoidal Boltzmann fits as

139 red lines (black lines represent mean values). Grey zones show SDs from technical triplicates.

140 Denaturation temperature ( $T_d$ ) is presented with error of fit. Source data for **a** and **b** are provided as

141 Source Data file.

142

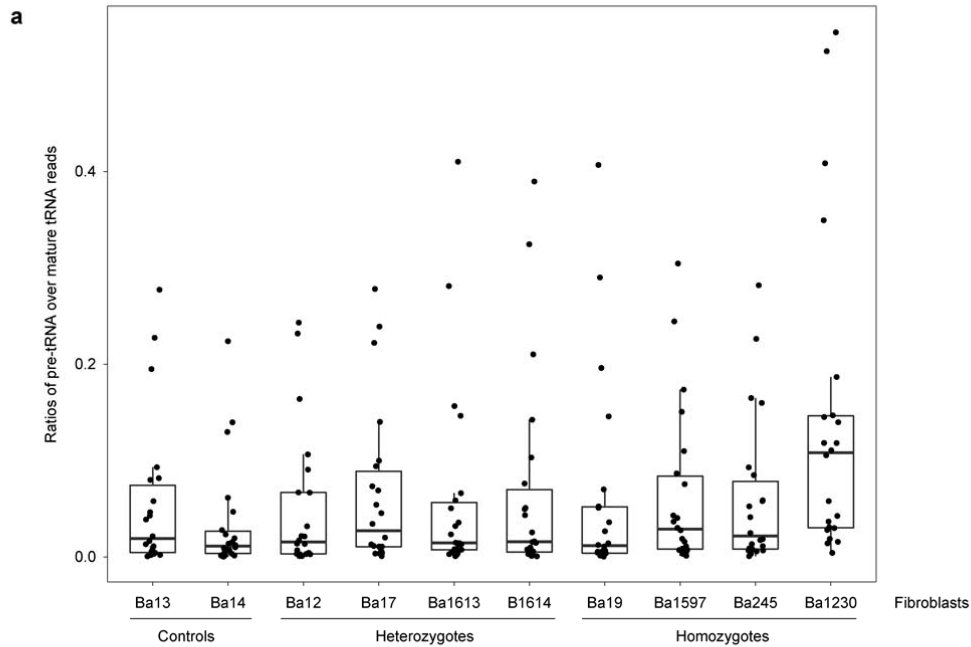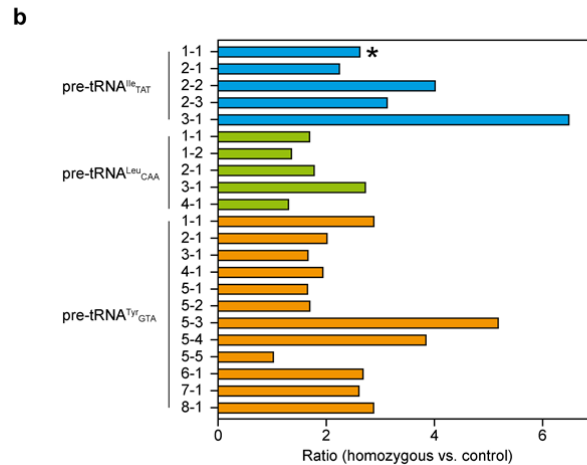

143

144 Supplementary Figure 8. **Hydro-tRNAseq reveals accumulation of intron-containing pre-tRNAs in**  
 145 ***TSEN54* c.919G>T fibroblasts.** **a** Boxplots showing ratios of pre-tRNA over mature tRNA reads for all  
 146 intron-containing tRNAs from hydro-tRNAseq of PCH patient-derived and control fibroblasts. Pre-tRNA  
 147 reads for all samples and tRNAs are less abundant than mature tRNA reads (ratios < 1). The lowest  
 148 median corresponds to a homozygous control, and the highest median to a homozygous *TSEN54*<sup>A307S</sup>  
 149 patient. Number of biologically independent samples: controls, n=2; heterozygotes, n=4;  
 150 homozygotes, n=4. The dark horizontal line within the box denotes the median. The middle 50% of the  
 151 data lie within the box. The lower and upper hinges correspond to the first and third quartiles (25th and  
 152 75th percentile, respectively). The upper whisker extends from the third quartile to the largest value no

153 further than 1.5 times the interquartile range (IQR; i.e., the distance between the first and third  
154 quartile). The lower whisker extends from the first quartile to the smallest value at most 1.5 times IQR  
155 from the hinge. Outliers are values beyond the whiskers and are plotted individually. **b** The ratio of  
156 hydro-tRNAseq reads mapped to pre-tRNAs over mature tRNAs was calculated for every intron-  
157 containing tRNA. The average ratio of all patients over the average ratio of all homozygous controls is  
158 shown. TSEN54 c.919G>T fibroblasts exhibit an increase of pre-tRNA/mature tRNA ratios for all  
159 intron-containing tRNAs. tRNA<sup>Ile</sup><sub>TAT</sub> isodecoders targeted by a 5' exon probe shown in [Fig. 5b](#) are  
160 highlighted in blue. tRNA<sup>Ile</sup><sub>TAT</sub>1-1 targeted by an intron probe in [Fig. 5b,d](#) is marked with an asterisk.  
161 Source data for **a** and **b** are provided as Source Data file.  
162

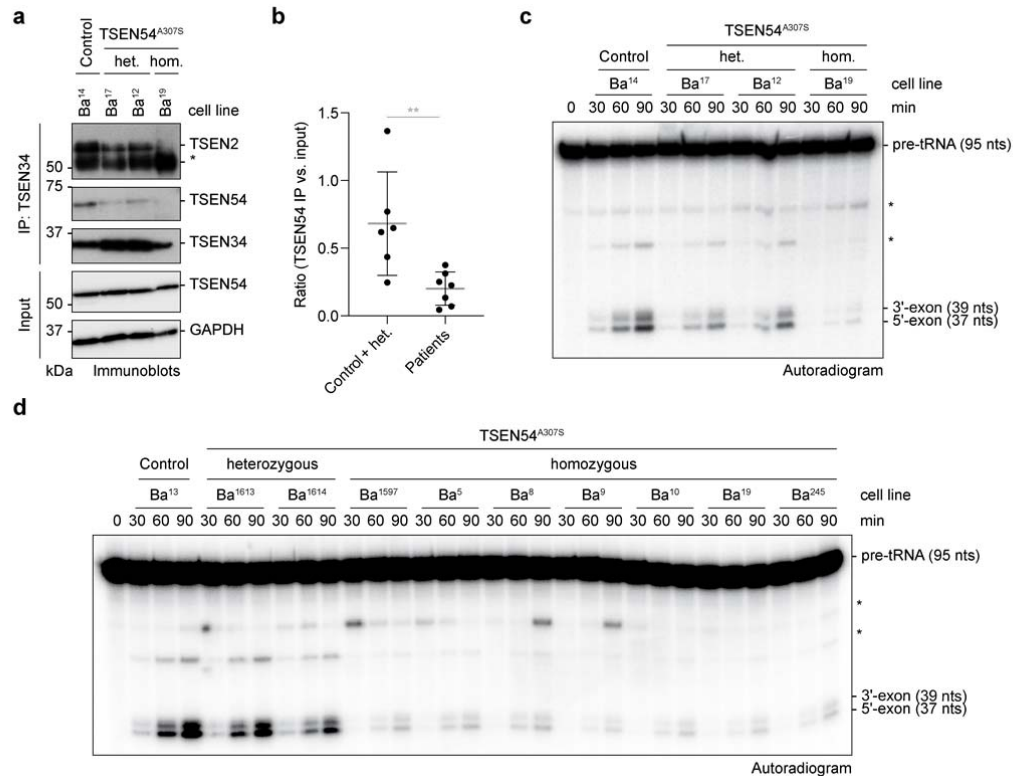

163

164 Supplementary Figure 9. **Reduced pre-tRNA cleavage activity in PCH patient-derived cell**  
 165 **extracts is associated with altered composition of TSEN.** **a** Co-immunoprecipitation (IP) assay  
 166 using an  $\alpha$ -TSEN34 antibody with cell lysates derived from a fibroblast control cell line (Ba<sup>14</sup>) and  
 167 fibroblasts derived from a PCH patient (Ba<sup>19</sup>) and the parents (Ba<sup>17</sup> and Ba<sup>12</sup>) analyzed by  
 168 immunoblotting. The asterisk indicates the heavy chain of the  $\alpha$ -TSEN34 antibody. GAPDH served as  
 169 a loading control. **b** Statistical analysis of Fig. 6a and Supplementary Fig. 9a showing the ratio of  
 170 immunoprecipitated (IP) TSEN54 versus input for control and heterozygous fibroblasts (n=6, different  
 171 cell lines) and homozygous PCH patient fibroblasts (n=7, different cell lines). Unpaired Student's *t*-test  
 172 (two-tailed) revealed a significant difference in levels of co-immunoprecipitated TSEN54 in  $\alpha$ -TSEN34  
 173 immunoprecipitates between the two groups (\*\**P*=0.0092). Data are presented as mean values  $\pm$ SD. **c**  
 174 On-bead pre-tRNA cleavage assay (time course) with radioactively labelled S.c. pre-tRNA<sup>Phe</sup><sub>GAA</sub> and  
 175 immunoprecipitated TSEN complexes ( $\alpha$ -TSEN34 antibody-coupled resin) shown in (a). Unspecific  
 176 bands are indicated by asterisks. **d** On-bead pre-tRNA cleavage assay (time course) with radioactively  
 177 labelled S.c. pre-tRNA<sup>Phe</sup><sub>GAA</sub> and immunoprecipitated TSEN complexes ( $\alpha$ -TSEN2 antibody-coupled  
 178 resin) derived from control fibroblasts and from fibroblasts carrying heterozygous or homozygous



179 *TSEN54* c.919G>T mutation. Unspecific bands are indicated by asterisks. Data are representative of  
180 at least two independent experiments. Source data for **a**, **c**, and **d**, are provided as Source Data file.  
181

182 **Supplementary Tables**

183

184 Supplementary Table 1. **Masses of protein subunits and complexes observed in native MS**  
 185 **spectra.** The experimentally determined and theoretically calculated masses as well as the mass  
 186 differences are given. A larger mass difference (\*) originates from incomplete desolvation and can be  
 187 in part attributed to the high phosphorylation state of the TSEN54 subunit ([Supplementary Fig. 1c](#)).

| Composition           | Experimental mass<br>(Da) | Theoretical mass<br>(Da) | Δ mass<br>(Da) |
|-----------------------|---------------------------|--------------------------|----------------|
| <b>TSEN</b>           |                           |                          |                |
| TSEN2–15–34–54        | 165573 ±130               | 164416                   | 1157 (*)       |
| unassigned            | 104865 ±48                |                          |                |
| HSP70                 | 71461 ±6                  | 71432                    | 29             |
| TSEN15–34             | 52389 ±15                 | 52350                    | 39             |
| TSEN15                | 18693 ±4                  | 18698                    | -5             |
| <b>TSEN/CLP1</b>      |                           |                          |                |
| unassigned            | 466075 ±127               |                          |                |
| unassigned            | 417988 ±36                |                          |                |
| TSEN2–15–34–54–2xCLP1 | 261096 ±182               | 259822                   | 1274 (*)       |
| TSEN2–15–34–54–1xCLP1 | 212967 ±98                | 212119                   | 848 (*)        |
| unassigned            | 123948 ±28                |                          |                |
| unassigned            | 104818 ±6                 |                          |                |
| HSP70                 | 71521 ±3                  | 71432                    | 89             |
| TSEN15–34             | 52412 ±7                  | 52350                    | 62             |
| CLP1                  | 47776 ±5                  | 47703                    | 73             |
| TSEN15                | 18704 ±0                  | 18698                    | 6              |
| <b>Subunits</b>       |                           |                          |                |
|                       | Uniprot KB                | Theoretical mass<br>(Da) |                |
| TSEN15                | Q8WW01                    | 18698                    |                |
| TSEN34                | Q9BSV6                    | 33652                    |                |
| TSEN2                 | Q8NCE0                    | 53247                    |                |
| TSEN54                | Q7Z6J9                    | 58819                    |                |
| CLP1                  | Q92989                    | 47703                    |                |
| HSP70                 | Q9U639                    | 71432                    |                |

188

189

190 Supplementary Table 2. **Protein identification by LC-MS/MS.** The protein masses, the number of  
 191 identified peptide sequences, the number of observed spectra, and the sequence coverage are given  
 192 for TSEN subunits and CLP1 of purified TSEN, TSEN/CLP1 and proteolyzed TSEN15–34 complexes.  
 193

TSEN

| Protein | UniProtKB | Mass<br>(Da) | Peptide sequences<br>(#) | Spectra<br>(#) | Sequence coverage<br>(%) |
|---------|-----------|--------------|--------------------------|----------------|--------------------------|
| TSEN15  | Q8WW01    | 18629        | 9                        | 140            | 47.4                     |
| TSEN34  | Q9BSV6    | 33631        | 53                       | 907            | 100.0                    |
| TSEN2   | Q8NCE0    | 53213        | 99                       | 1228           | 98.5                     |
| TSEN54  | Q7Z6J9    | 58783        | 67                       | 771            | 84.8                     |

TSEN/CLP1

| Protein | UniProtKB | Mass<br>(Da) | Peptide sequences<br>(#) | Spectra<br>(#) | Sequence coverage<br>(%) |
|---------|-----------|--------------|--------------------------|----------------|--------------------------|
| TSEN15  | Q8WW01    | 18629        | 11                       | 180            | 73                       |
| TSEN34  | Q9BSV6    | 33631        | 58                       | 1583           | 100                      |
| TSEN2   | Q8NCE0    | 53213        | 86                       | 1946           | 99                       |
| TSEN54  | Q7Z6J9    | 58783        | 68                       | 1132           | 95                       |
| CLP1    | Q92989    | 47615        | 75                       | 1314           | 100                      |

Proteolyzed TSEN15–34

| Protein | UniProtKB | Mass<br>(Da) | Peptide sequences<br>(#) | Spectra<br>(#) | Sequence coverage<br>(%) |
|---------|-----------|--------------|--------------------------|----------------|--------------------------|
| TSEN15  | Q8WW01    | 18629        | 9                        | 92             | 87                       |
| TSEN34  | Q9BSV6    | 33631        | 14                       | 275            | 34                       |

194

195

196 Supplementary Table 3. **Masses of proteolytic fragments of TSEN15 and TSEN34 obtained from**  
197 **denaturing MS.** The experimentally determined and theoretically calculated masses as well as the  
198 mass difference are given.

| Protein fragment             | Experimental mass (Da) | Theoretical mass (Da) | $\Delta$ mass (Da) |
|------------------------------|------------------------|-----------------------|--------------------|
| TSEN15 (residues 23 to 170)  | 16313.9 $\pm$ 1.0      | 16314.7               | -0.8               |
| TSEN15 (residues 23 to 171)  | 16469.8 $\pm$ 0.9      | 16470.9               | -1.1               |
| TSEN34 (residues 208 to 310) | 11614.8 $\pm$ 0.7      | 11615.2               | -0.4               |

199  
200

201 Supplementary Table 4. **Identification of proteolytic fragments of TSEN15 and TSEN34 by LC-**  
 202 **MS/MS.** The position in the protein sequence, the sequence of observed tryptic peptides and the  
 203 number of spectra for each peptide are given. The preceding and following amino acids are given for  
 204 each peptide sequence.

| TSEN15   |                                                   |           |
|----------|---------------------------------------------------|-----------|
| Residues | Peptide sequence                                  | # spectra |
| 23-45    | R.GFGDGGGAPSWAPEDAWMGTHPK.Y                       | 22        |
| 46-74    | K.YLEMMELDIGDATQVYVAFVYLDLMESK.S + Oxidation (M)  | 4         |
| 75-118   | K.SWHEVNCVGLPELQLICLVGTEIEGEGQLQTVVPTPITASLSHNR.I | 6         |
| 119-127  | R.IREILKASR.K                                     | 7         |
| 121-127  | R.EILKASR.K                                       | 7         |
| 128-154  | R.KLQGDPDLPMSFTLAIVESDSTIVYYK.L                   | 13        |
| 155-170  | K.LTDGFMLPDPQNISLR.R                              | 17        |
| 155-171  | K.LTDGFMLPDPQNISLRR.-                             | 16        |

205  
206

| TSEN34   |                                |           |
|----------|--------------------------------|-----------|
| Residues | Peptide sequence               | # spectra |
| 204-220  | R.VQSKDWPAGRPAHEL.R.Y          | 1         |
| 208-220  | K.DWPAGRPAHEL.R.Y              | 37        |
| 221-230  | R.YSIYRDLWER.G                 | 61        |
| 231-253  | R.GFFLSAAGKFGGDFLVYPGDPLR.F    | 1         |
| 240-253  | K.FGGDFLVYPGDPLR.F             | 6         |
| 254-279  | R.FHAHYIAQCWAPEDTIPLQDLVAAGR.L | 7         |
| 280-286  | R.LGTSVRK.T                    | 4         |
| 280-298  | R.LGTSVRKTLLLCSPQPDGK.V        | 8         |
| 286-298  | R.KTLLLCSPQPDGK.V              | 75        |
| 286-310  | R.KTLLLCSPQPDGKVVYTSLQWASLQ.-  | 1         |
| 287-298  | K.TLLLCSPQPDGK.V               | 68        |
| 287-310  | K.TLLLCSPQPDGKVVYTSLQWASLQ.-   | 3         |
| 299-310  | K.VVYTSLQWASLQ.-               | 3         |

207  
208

209 Supplementary Table 5. **X-ray data collection, refinement, and validation statistics.** The structure  
 210 of TSEN15–34 was determined from one protein crystal. Values in parentheses are given for highest-  
 211 resolution shell.

| TSEN15–34 (PDB 6Z9U)                        |                               |
|---------------------------------------------|-------------------------------|
| Data collection                             |                               |
| Space group                                 | P 1 21 1                      |
| Cell dimensions                             |                               |
| <i>a</i> , <i>b</i> , <i>c</i> (Å)          | 34.85, 69.28, 94.79           |
| $\alpha$ , $\beta$ , $\gamma$ (°)           | 90, 98.31, 90                 |
| Resolution (Å)                              | 28.3 - 2.1(2.175 - 2.1)       |
| $R_{\text{merge}}$                          | 0.07428 (0.8863)              |
| $I / \sigma I$                              | 13.37 (1.44)                  |
| Completeness (%)                            | 0.99 (0.99)                   |
| Redundancy                                  | 5.9 (5.9)                     |
| Refinement                                  |                               |
| Resolution (Å)                              | 28.3 - 2.1                    |
| No. reflections                             | 25898 (2576)                  |
| $R_{\text{work}} / R_{\text{free}}$         | 19.18 (30.49) / 25.28 (36.27) |
| No. atoms                                   |                               |
| Protein                                     | 3516                          |
| Ligand/ion                                  | 12                            |
| Water                                       | 120                           |
| <i>B</i> -factor (average, Å <sup>2</sup> ) |                               |
| Protein                                     | 60.17                         |
| Ligand/ion                                  | 60.10                         |
| Water                                       | 78.56                         |
| R.m.s. deviations                           |                               |
| Bond lengths (Å)                            | 60.32                         |
| Bond angles (°)                             | 0.009                         |
| Validation                                  |                               |
| Ramachandran plot                           |                               |
| Favored (%)                                 | 97                            |
| Allowed (%)                                 | 2.5                           |
| Outliers (%)                                | 0.2                           |
| Rotamer outliers (%)                        | 1                             |
| Clash score                                 | 9.26                          |

212



213 Supplementary Table 6. **DSF data analyzed by ProteoPlex.**  $T_d$  – denaturing temperature.

| TSEN complex                 | $T_d$ - Boltzman<br>(°C) | $T_d$ - ProteoPlex<br>(°C) | $R^2$ (fit to data) | $R^2$ (fit to 2-state<br>unfolding) |
|------------------------------|--------------------------|----------------------------|---------------------|-------------------------------------|
| TSEN (wt)                    | 51.0                     | 52.1                       | 0.99973             | 0.99899                             |
| TSEN (T2 <sup>Y309C</sup> )  | 44.8                     | 46.3                       | 0.99979             | 0.99955                             |
| TSEN (T34 <sup>R58W</sup> )  | 44.1                     | 46.5                       | 0.99955             | 0.99902                             |
| TSEN (T54 <sup>S93P</sup> )  | 46.5                     | 48.7                       | 0.99935             | 0.99818                             |
| TSEN (T54 <sup>A307S</sup> ) | 49.6                     | 50.7                       | 0.99978             | 0.99951                             |

214

215

216 Supplementary Table 7. List of patient-derived primary fibroblast cells used in this study.

| Cell line    | Mutations                                               | Description       | Zygoty                |
|--------------|---------------------------------------------------------|-------------------|-----------------------|
| Ba1          | <i>TSEN54</i> c.919G / 919G                             | control           | homozygous            |
| Ba2          | <i>TSEN54</i> c.919G / 919G                             | control           | homozygous            |
| Ba3          | <i>TSEN54</i> c.919G / 919G                             | control           | homozygous            |
| Ba5          | <i>TSEN54</i> c.919G>T / 919G>T                         | PCH2 patient      | homozygous            |
| Ba8          | <i>TSEN54</i> c.919G>T / 919G>T                         | PCH2 patient      | homozygous            |
| Ba9          | <i>TSEN54</i> c.919G>T / 919G>T                         | PCH2 patient      | homozygous            |
| Ba10         | <i>TSEN54</i> c.919G>T / 919G>T                         | PCH2 patient      | homozygous            |
| Ba12         | <i>TSEN54</i> c.919G / 919G>T                           | parent of Ba19    | heterozygous          |
| Ba13         | <i>TSEN54</i> c.919G / 919G                             | control           | homozygous            |
| Ba14         | <i>TSEN54</i> c.919G / 919G                             | control           | homozygous            |
| Ba15         | <i>TSEN54</i> c.919G / 919G                             | control           | homozygous            |
| Ba17         | <i>TSEN54</i> c.919G / 919G>T                           | parent of Ba19    | heterozygous          |
| Ba18         | <i>TSEN54</i> c.919G>T / 919G>T                         | PCH2 patient      | homozygous            |
| Ba19         | <i>TSEN54</i> c.919G>T / 919G>T                         | PCH2 patient      | homozygous            |
| Ba20         | <i>TSEN54</i> c.919G>T / 923delC<br>p.(Pro318Gln fsX23) | PCH4 patient      | compound heterozygous |
| Ba245        | <i>TSEN54</i> c.919G>T / 919G>T                         | PCH2 patient      | homozygous            |
| Ba1230       | <i>TSEN54</i> c.919G>T / 919G>T                         | PCH2 patient      | homozygous            |
| Ba1613       | <i>TSEN54</i> c.919G / 919G>T                           | parent of Ba1597  | heterozygous          |
| Ba1614       | <i>TSEN54</i> c.919G / 919G>T                           | parent of Ba1597  | heterozygous          |
| Ba1597       | <i>TSEN54</i> c.919G>T / 919G>T                         | PCH2 patient      | homozygous            |
| T1 (BAB3846) | <i>CLP1</i> c.419G / 419G>A                             | parent of BAB3402 | heterozygous          |
| T3 (BAB3402) | <i>CLP1</i> c.419G>A / 419G>A                           | patient           | homozygous            |

217

218

| Primer                        | Sequence (5'-3')                                        |
|-------------------------------|---------------------------------------------------------|
| TSEN2_BamHI_for               | TCTGTTTGGATCCATGGCAGAAGCAGTTTTCCATG                     |
| TSEN2_BamHI_His-TEV_for       | GTTTGGATCCATGGGTCATCACCATCACCATCACGGTGAGAATCTTTATTTTCAG |
| TSEN2_His-TEV_for             | CACGGTGAGAATCTTTATTTTCAGGGCATGGCAGAAGCAGTTTTCCATG       |
| TSEN2_XbaI_rev                | CAGGCTCTAGATTAAGATCGTCTTGGTCACTCC                       |
| TSEN15_BamHI_His-TEV_for      | GTTTGGATCCATGGGTCATCACCATCACCATCACGGTGAGAATCTTTATTTTCAG |
| TSEN15_His-TEV_for            | CACGGTGAGAATCTTTATTTTCAGGGCATGGAGGAGCGCGGGCATTCC        |
| TSEN15_NotI_rev               | GAAAGCGGCCGCTCATCTTCTAAGAGAAATATTCTGAG                  |
| TSEN15_BamHI-His10_for        | TCCGGGGATCCATGGGTCATCATCACCACCATCACCATCACCATCACGGTG     |
| TSEN15_NotI_short_rev         | AAAGCGGCCGCTCATCTTC                                     |
| TSEN15_23-170_for             | CTTTATTTTCAGGGCTTTGGCGACGGCGGTGGAG                      |
| TSEN15_23-170_rev             | TTCGAAAGCGGCCGCTCATCTAAGAGAAATATTCTGAGGG                |
| pMIDK_His_for                 | ATTTCTTAGATGAGCGGCCGCTTTCGAATCTAG                       |
| pMIDK_His_QS_rev              | ACGCGCTCGCCAAAGCCCTGAAAATAAAGATTCTCACC                  |
| TSEN34_AflII_for              | AGCCACTTAAGATGCTGGTGGAGGTGG                             |
| TSEN34_SphI_rev               | GTACCGCATGCTCACTGCAGGCTGGCCCATG                         |
| TSEN34_208-310_for            | CTGTTTGGATCCATGGACTGGCCCCACGCCGGC                       |
| TSEN34_208-310_rev            | GCAGGCTCTAGATTACTGCAGGCTGGCCCATG                        |
| TSEN54_BamHI_for              | TGTTTGGATCCATGGAGCCCGAGCCCGAGC                          |
| TSEN54_XbaI_rev               | CAGGCTCTAGATCAGTGCCCCACATCCTGGG                         |
| CLP1_BamHI_for                | TCTGTTTGGATCCATGGGAGAAGAGGCTAATGATG                     |
| CLP1_BamHI_His-TEV_for        | GTTTGGATCCATGGGTCATCACCATCACCATCACGGTGAGAATCTTTATTTTCAG |
| CLP1_His-TEV_for              | CACGGTGAGAATCTTTATTTTCAGGGCATGGGAGAAGAGGCTAATGATG       |
| CLP1_XbaI_rev                 | CAGGCTCTAGACTACTTCAGATCCATGAACCGG                       |
| TSEN34_H255A_Quikchange_for   | GCGATATAATGGCGCGCGAAGCGGAGGGGGTC                        |
| TSEN34_H255A_Quikchange_rev   | GACCCCTCCGCTTCGCCGCCATTATATCGC                          |
| TSEN2_H377A_Quikchange_for    | ATGACAGAATAACTTGCAGCGTAAAATGGAGGGCCTTTCCG               |
| TSEN2_H377A_Quikchange_rev    | CGGAAAGGCCCTCCATTTACGCTGCAAGTTATTCTGTCAT                |
| TSEN2_Y309C_Quikchange_for    | GCCTTTTTCTTGGTCTGTGCTCTGGGATGTTAAGTATTTAC               |
| TSEN2_Y309C_Quikchange_rev    | TAAACATCCCAGAGCACAGACCAAGAAAAAGGCCCTCTCTAG              |
| TSEN54_A307S_Quikchange_for   | GCGGCTGTCTGAAGACATGTTGGGAAGG                            |
| TSEN54_A307S_Quikchange_rev   | CCTTCCCCAACATGTCTTCAGACAGCCGC                           |
| TSEN54_S93P_Quikchange_for    | TGCCCGCGGGAGGCTTCAACTCCACG                              |
| TSEN54_S93P_Quikchange_rev    | CGTGGAGTTGAAGCCTCCCGCGGGCA                              |
| TSEN34_R58W_Quikchange_for    | CGGCAAGAGCCACGCCTCTTCGGG                                |
| TSEN34_R58W_Quikchange_rev    | CCCGAAGAGGCGTGGCTCTTGGCCG                               |
| Pre-tRNA-PheGAA-BamHI_for     | TCCGGGGATCCAATTAATACGACTCACTATAGCGGATTAGCTCAGTTGGGAG    |
| Pre-tRNA-PheGAA-HindIII_rev   | ACGCCAAGCTTCTGGTGCGAATTCTGTGGATCG                       |
| Pre-tRNA-PheGAA_CC_for        | AGAAAAAAGCTTCGGTCAACTTATCTGGAGGTCTCTGTG                 |
| Pre-tRNA-PheGAA_CC_rev        | CACAGGACCTCCAGATAAGTTGACCGAAGTTTTTTCT                   |
| Pre-tRNA-PheGAA_GG/GC_for     | AGTTGGGAGAGCGCCAGAGTGAAGAAAAAAGCTTC                     |
| Pre-tRNA-PheGAA_GG/GC_rev     | GAAGTTTTTTCTCACTTGGCGCTCTCCCACT                         |
| tRNA-PheGAA_Quikchange_for    | GAGCGCCAGACTGAAGATCTGGAGGTCCCTGTG                       |
| tRNA-PheGAA_Quikchange_rev    | CACAGGACCTCCAGATCTTCAGTCTGGCGCTC                        |
| tRNA-PheGAA_Q5_for            | ATCTGGAGGTCTGTGTTT                                      |
| tRNA-PheGAA_Q5_rev            | CTTCAGTCTGGCGCTCTC                                      |
| Pre-tRNA-TyrGTA-8-1_1°_for    | GCTAGGGGTCTTTTCGATAG                                    |
| Pre-tRNA-TyrGTA-8-1_1°_rev    | TTCAAAGCTTTTCGCTCTTCGAG                                 |
| Pre-tRNA-TyrGTA_8-1_2°_for    | TCCGGGGATCCAATTAATACGACTCACTATAGGTTTCGATAGCTCAGTTGGTAG  |
| Pre-tRNA-TyrGTA_8-1_2°_rev    | ACGCCAAGCTTCTGGTGGTTCGAGCCGGATTCCG                      |
| Pre-tRNA-TyrGTA_8-1_CC_for    | GAGGACTGTAGGTTTCAATAAAGTAAACGCATCCTTAGGTC               |
| Pre-tRNA-TyrGTA_8-1_CC_rev    | GACCTAAGGATGCGTTAGTTTAAATGAACCTACAGTCCTC                |
| Pre-tRNA-TyrGTA_8-1_GG/GC_for | CAGTTGGTAGAGCGGAGGAGTGTAGGTTTCAATAAAG                   |
| Pre-tRNA-TyrGTA_8-1_GG/GC_rev | GTTTAAATGAACCTACACTCCTCCGCTCTACCAACTG                   |
| CasI_For                      | AACGCTCTATGGTCTAAAGATTTAAATCGACCTACTCCGGAATATTAATAGATC  |
| CasI_Rev                      | AAACGTGCAATAGTATCCAGTTTATTTAAATGGTTATGATAGTTATTGCTCAGC  |
| CasII_For                     | AAACTGGATACTATTGCACGTTTAAATCGACCTACTCCGGAATATTAATAGATC  |

| <b>Primer</b>               | <b>Sequence (5'-3')</b>                                 |
|-----------------------------|---------------------------------------------------------|
| CasII_Rev                   | AAACATCAGGCATCATTAGGTTTATTTAAATGGTTATGATAGTTATTGCTCAGCG |
| CasIII_For                  | AAACCTAATGATGCCTGATGTTTAAATCGACCTACTCCGGAATATTAATAGATC  |
| CasIII_Rev                  | AAACTAAGCTATGTGAACCGTTTATTTAAATGGTTATGATAGTTATTGCTCAGCG |
| CasIV_For                   | AAACGGTTCACATAGCTTAGTTTAAATCGACCTACTCCGGAATATTAATAGATC  |
| CasOmega_Rev                | AACCCCGATTGAGATATAGATTTATTTAAATGGTTATGATAGTTATTGCTCAGCG |
| TSEN2_H377A_Quikchange_For  | GTCCGCCGTTCTACGCCGCGAGCTATAGCG                          |
| TSEN2_H377A_Quikchange_Rev  | CGCTATAGCTCGCGGCGTAGAACGGCGGAC                          |
| TSEN34_H255A_Quikchange_For | CGATCCGCTGCGTTTCGCTGCGCACTATATCGC                       |
| TSEN34_H255A_Quikchange_Rev | GCGATATAGTGCGCAGCGAAACGCAGCGGATCG                       |

221
